# Supplementary material for: CO2 electrolysis to multi-carbon products in strong acid at ampere-current levels on La-Cu spheres with channels
Source: PubMed Central journal article supplement (PMC11156665; doi:10.1038/s41467-024-49308-8), 2024-06-06
Supplement: 41467_2024_49308_MOESM1_ESM.pdf [file 41467_2024_49308_MOESM1_ESM.pdf]

## Supporting Information

### **CO<sub>2</sub> electrolysis to multi-carbon products in strong acid at ampere-current levels on La-Cu spheres with channels**

Jiaqi Feng<sup>1,2</sup>, Limin Wu<sup>1,3</sup>, Xinning Song<sup>1,3</sup>, Libing Zhang<sup>1,3</sup>, Shunhan Jia<sup>1,3</sup>, Xiaodong Ma<sup>1,3</sup>, Xingxing Tan<sup>1,3</sup>, Xinchun Kang<sup>1,3</sup>, Qinggong Zhu<sup>1,3</sup>, Xiaofu Sun<sup>1,3\*</sup>, Buxing Han<sup>1,3,4\*</sup>

1. Beijing National Laboratory for Molecular Sciences, Key Laboratory of Colloid and Interface and Thermodynamics, Center for Carbon Neutral Chemistry, Institute of Chemistry, Chinese Academy of Sciences, Beijing 100190, China

2. College of Chemical Engineering and Environment, China University of Petroleum (Beijing), Beijing 102249, China

3. School of Chemical Sciences, University of Chinese Academy of Sciences, Beijing 100049, China

4. Shanghai Key Laboratory of Green Chemistry and Chemical Processes, School of Chemistry and Molecular Engineering, East China Normal University, Shanghai 200062, China

\* To whom correspondence should be addressed. Email: [sunxiaofu@iccas.ac.cn](mailto:sunxiaofu@iccas.ac.cn) and [hanbx@iccas.ac.cn](mailto:hanbx@iccas.ac.cn)

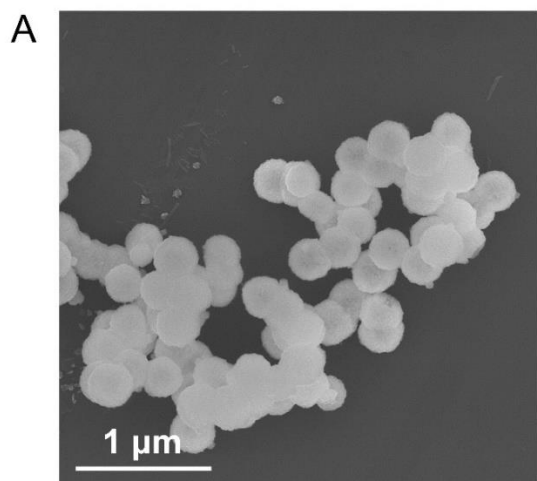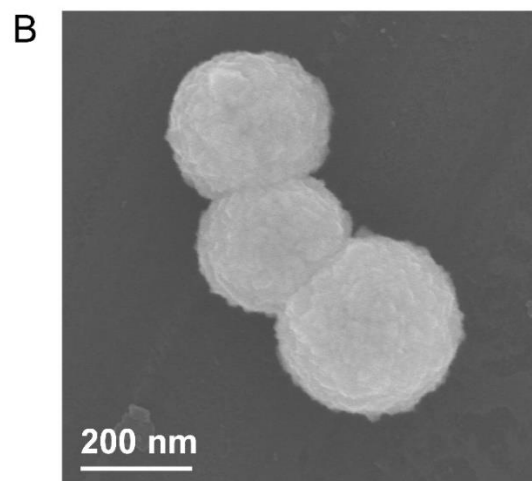

**Supplementary Fig. S1** | SEM images of La-Cu<sub>2</sub>O HS in (A) low and (B) high magnification.

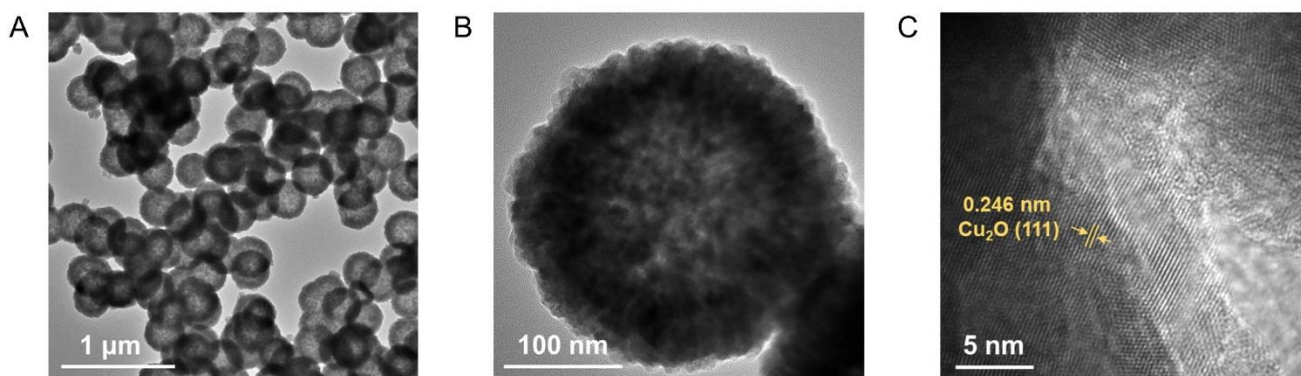

**Supplementary Fig. S2** | (A, B) TEM images and (C) HRTEM image of La-Cu<sub>2</sub>O HS.

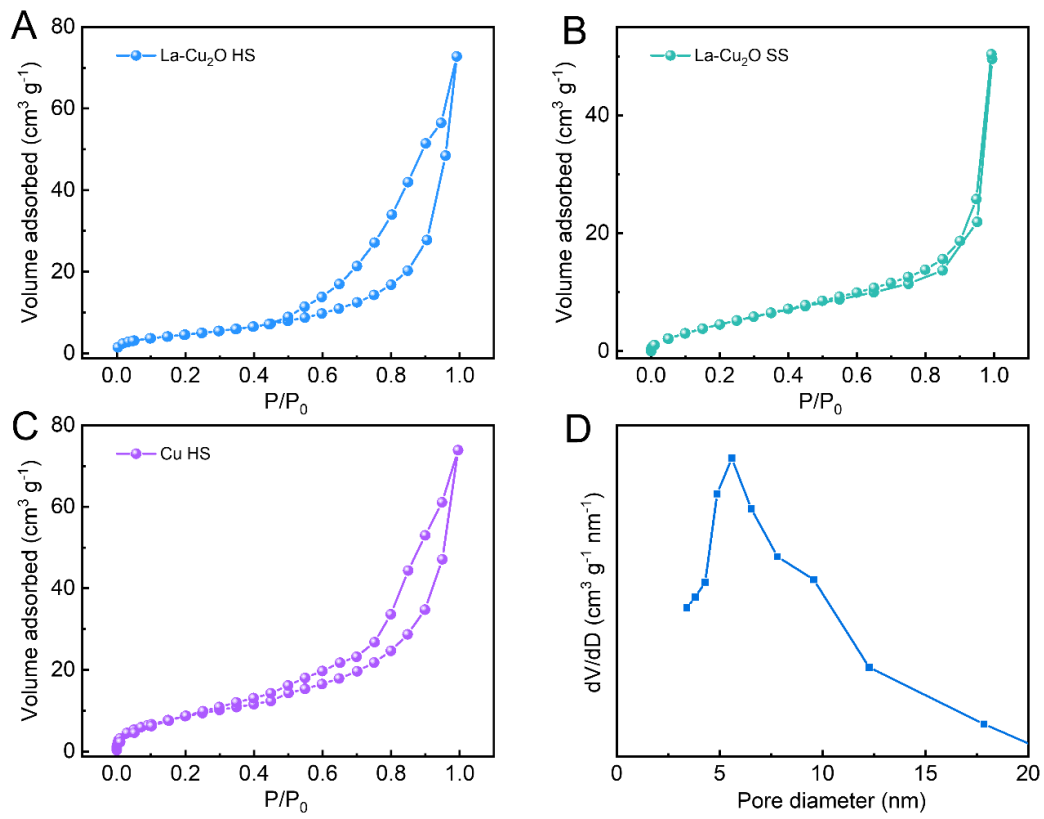

**Supplementary Fig. S3** | Nitrogen adsorption-desorption isotherm of (A) La-Cu<sub>2</sub>O HS, (B) La-Cu<sub>2</sub>O SS, and (C) CuO<sub>x</sub> HS. (D) The corresponding BJH pore size distribution of La-Cu<sub>2</sub>O HS.

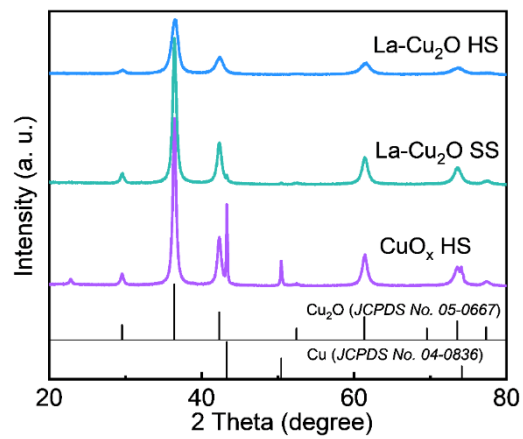

**Supplementary Fig. S4** | XRD patterns of La-Cu<sub>2</sub>O HS, La-Cu<sub>2</sub>O SS, and CuO<sub>x</sub> HS.

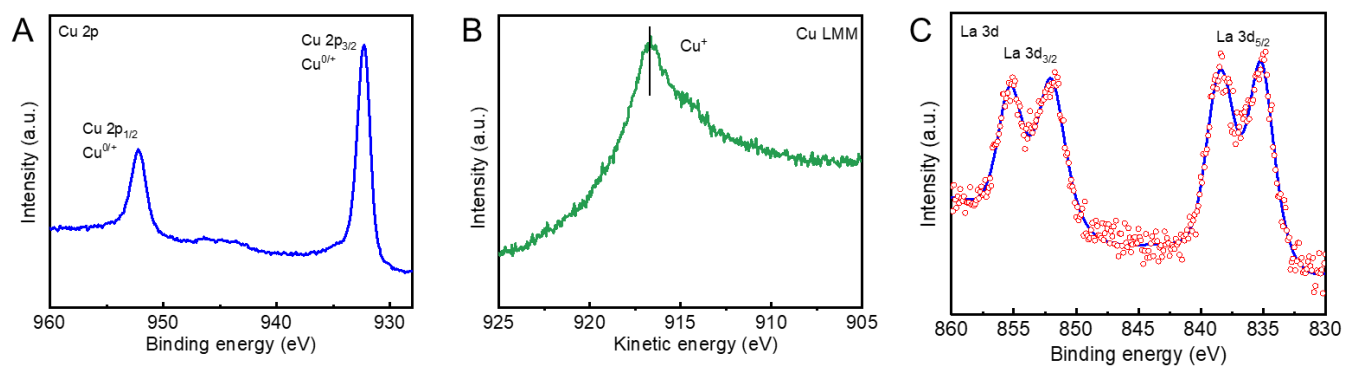

**Supplementary Fig. S5** | (A) Cu 2p XPS profile, (B) Cu Auger LMM spectra, and (C) La 3d XPS profile of La-Cu<sub>2</sub>O

HS.

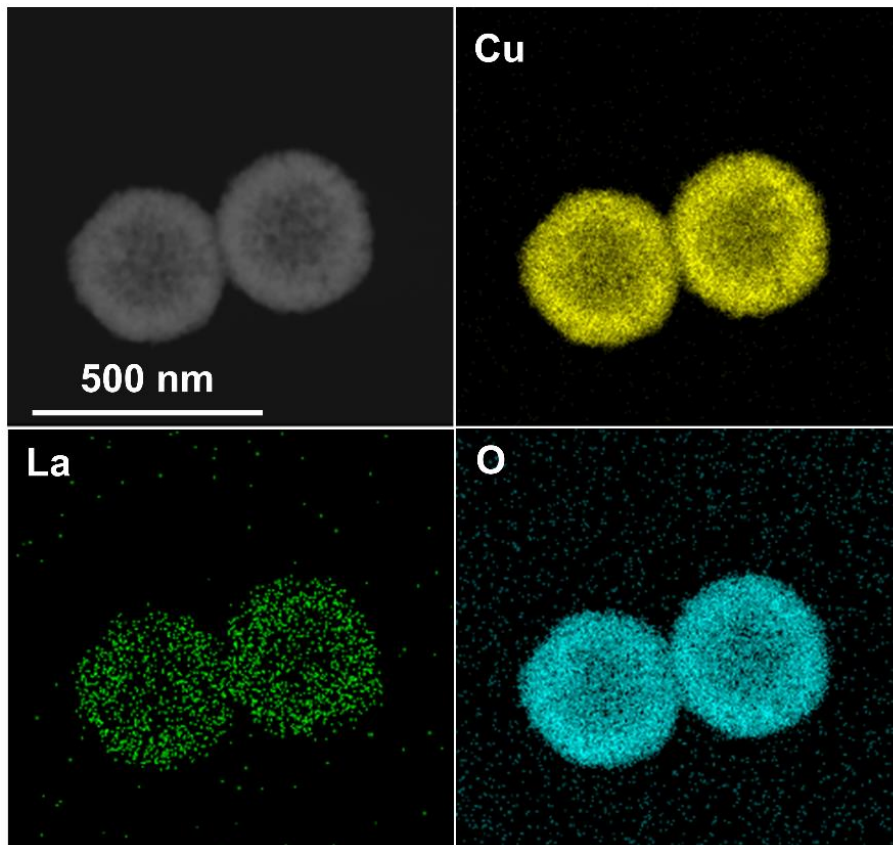

**Supplementary Fig. S6** | EDS mapping of La-Cu<sub>2</sub>O HS. Yellow, green, and blue represent Cu, La, and O elements, respectively. The results indicate that Cu, La, and O elements are uniformly distributed on La-Cu<sub>2</sub>O HS.

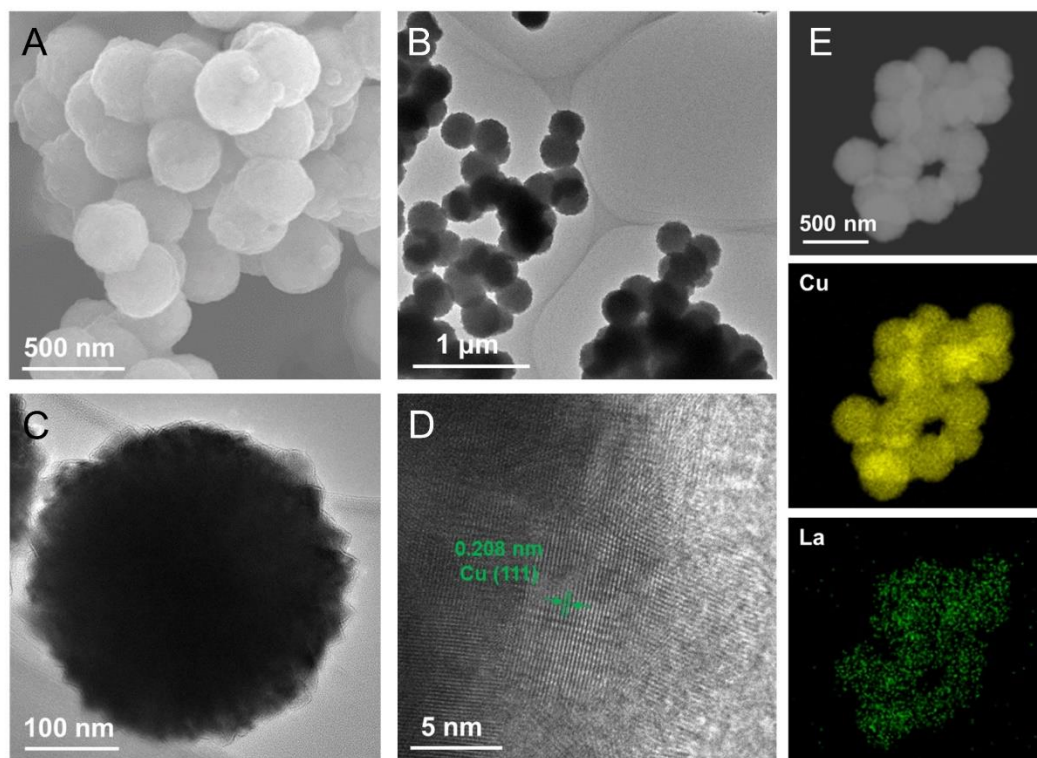

**Supplementary Fig. S7** | (A) SEM, (B, C) TEM, (D) HRTEM images, and (E) EDS mapping of La-Cu SS (yellow and green represent Cu and La elements, respectively).



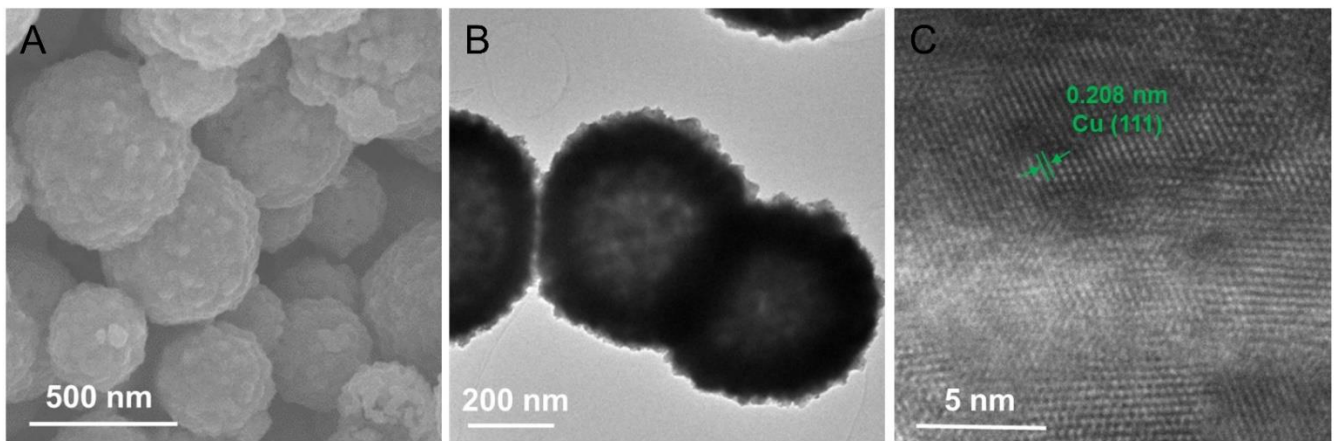

**Supplementary Fig. S8** | (A) SEM, (B) TEM, and (C) HRTEM images of Cu HS.

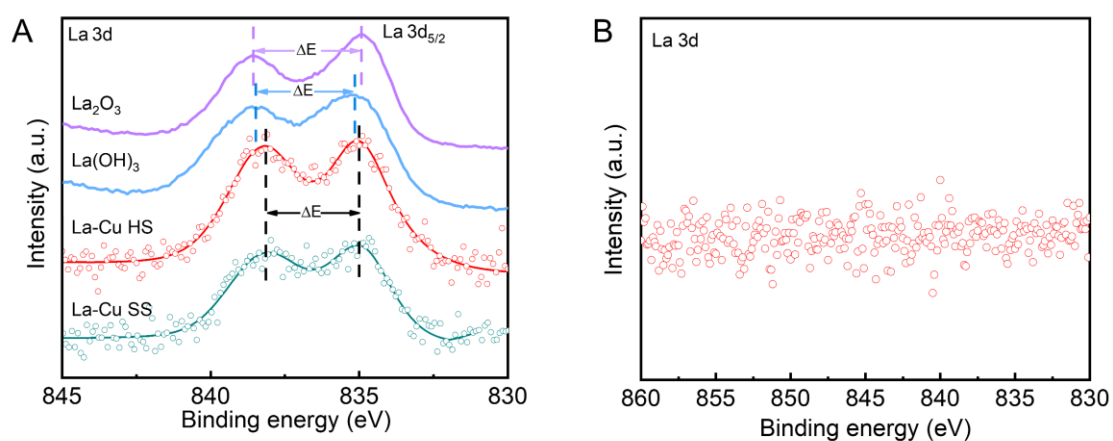

**Supplementary Fig. S9** | La 3d XPS profile of (A) La-Cu HS, La-Cu SS,  $\text{La}_2\text{O}_3$ ,  $\text{La}(\text{OH})_3$  and (B) Cu HS.

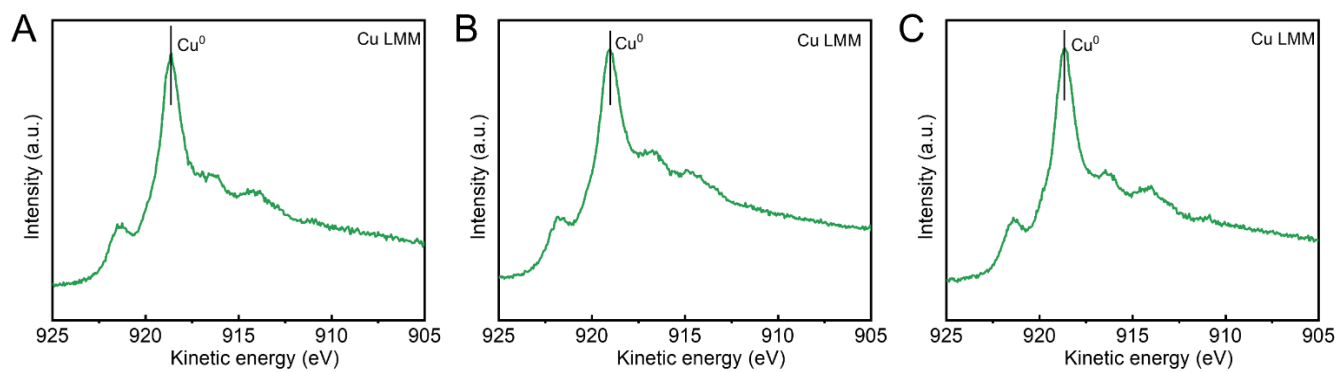

**Supplementary Fig. S10** | Cu Auger LMM spectra of (A) La-Cu HS, (B) La-Cu SS, and (C) Cu HS.

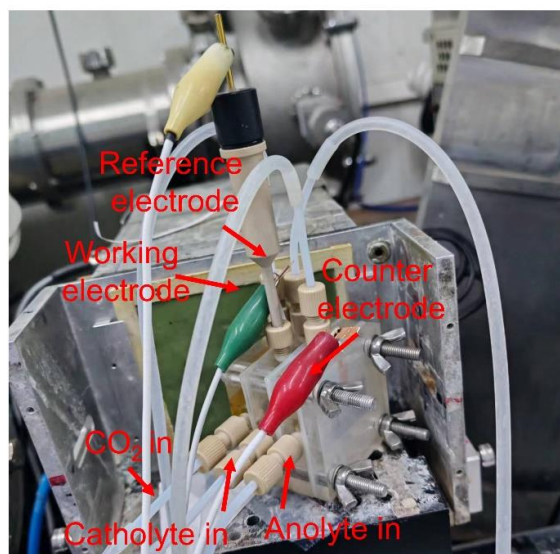

**Supplementary Fig. S11** | The optical photo of flow cell used for *in situ* XAS experiment.

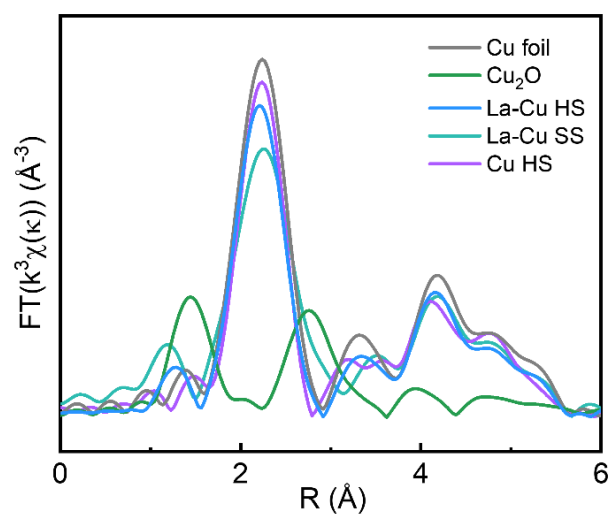

**Supplementary Fig. S12** | Fourier transform extended X-ray absorption fine structure spectra of La-Cu HS, La-Cu SS, and Cu HS.

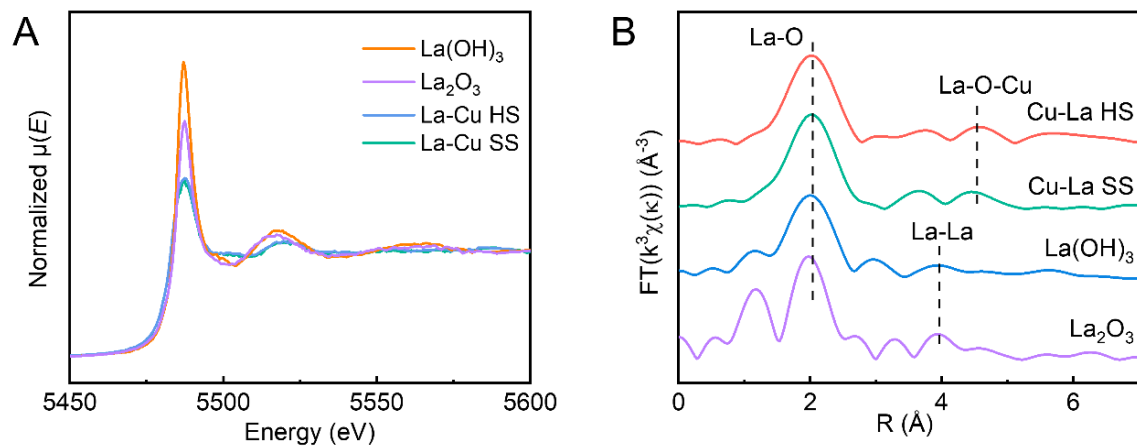

**Supplementary Fig. S13** | (A) La L<sub>3</sub>-edge XANES spectra and (B) FT EXAFS spectra of La-Cu HS, La-Cu SS, La(OH)<sub>3</sub> and La<sub>2</sub>O<sub>3</sub>.

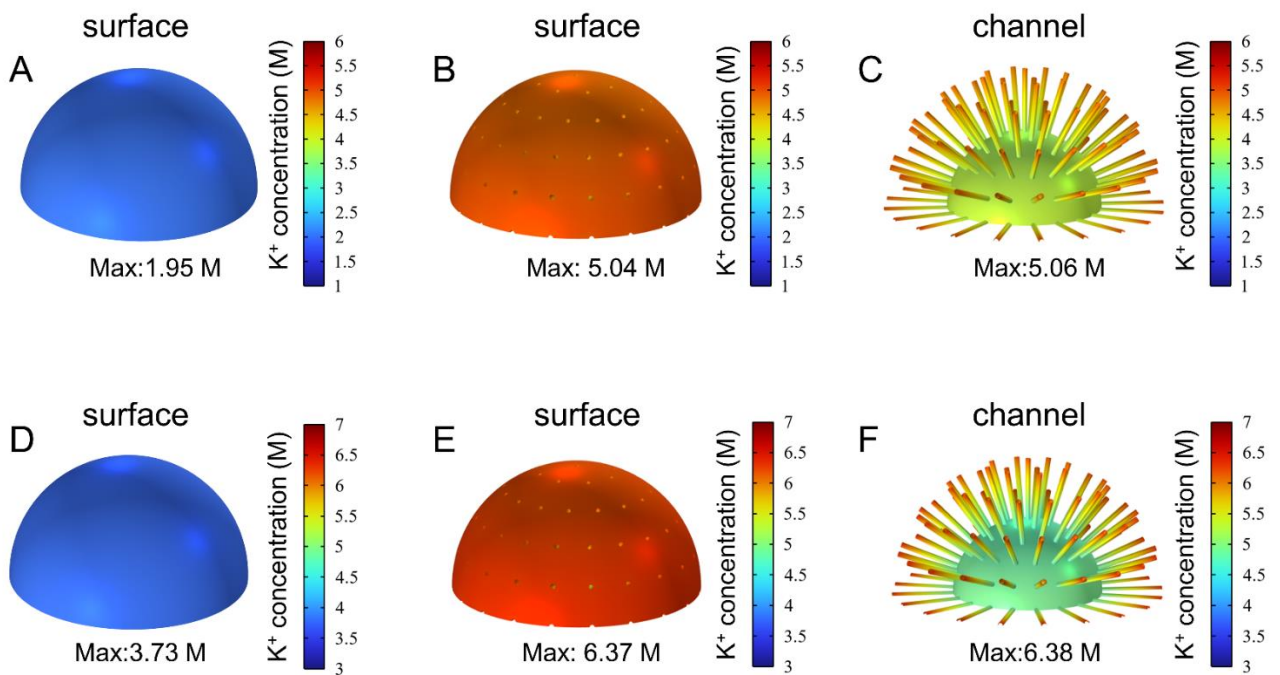

**Supplementary Fig. S14** | The  $K^+$  concentration distribution over surface of (A) solid sphere, (B) hollow sphere with channels, and within channels of (C) hollow sphere at -300 mA. The  $K^+$  concentration distribution over surface of (D) solid sphere, (E) hollow sphere with channels, and within channels of (F) hollow sphere at -500 mA.

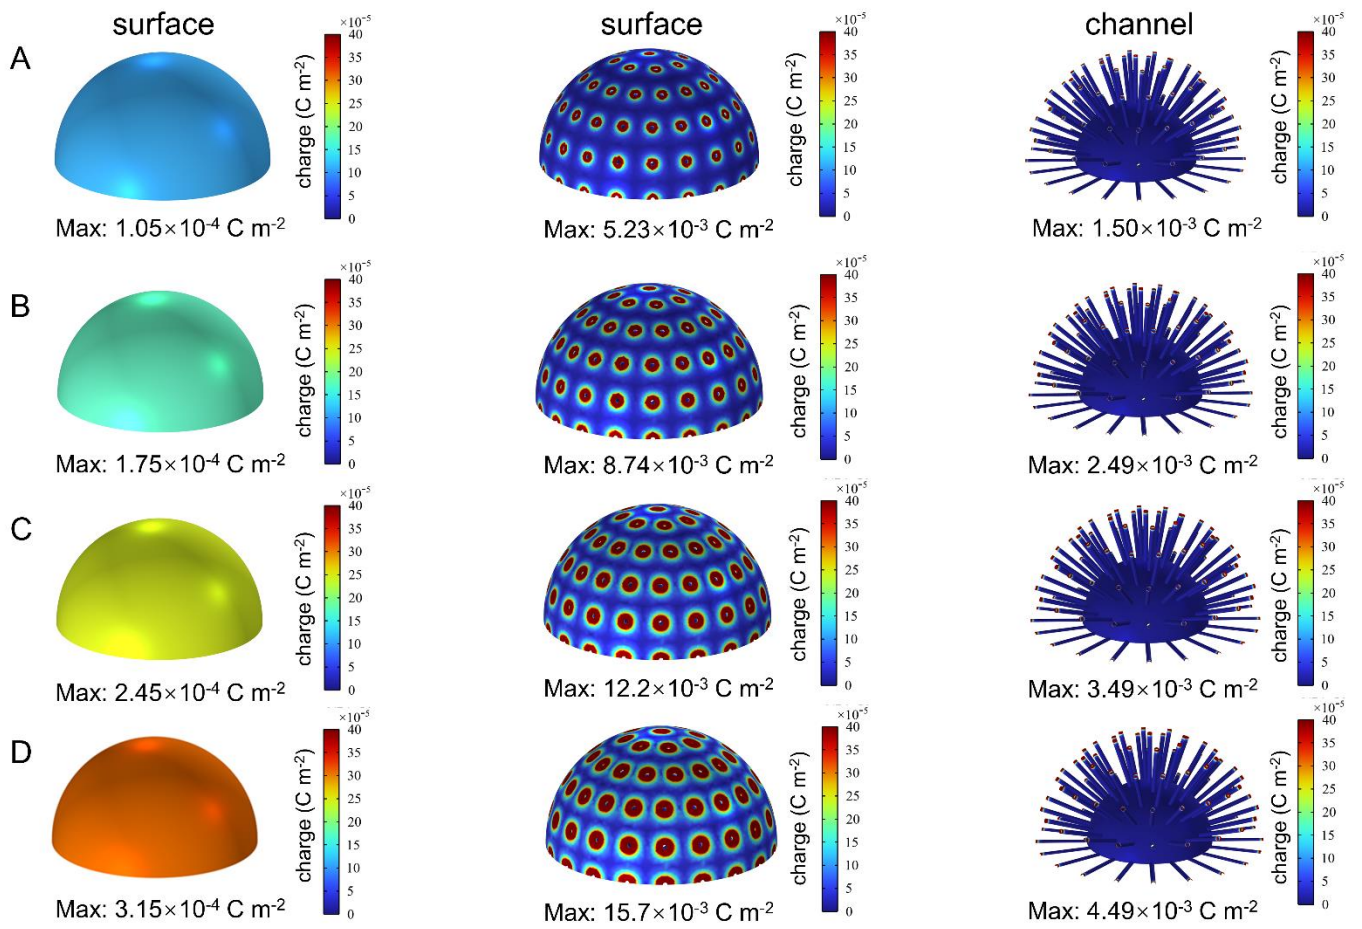

**Supplementary Fig. S15** | The negative charge distribution over solid sphere, hollow sphere with channels, and within channels of hollow sphere at (A) -300 mA, (B) -500 mA, (C) -700 mA, and (D) -900 mA.



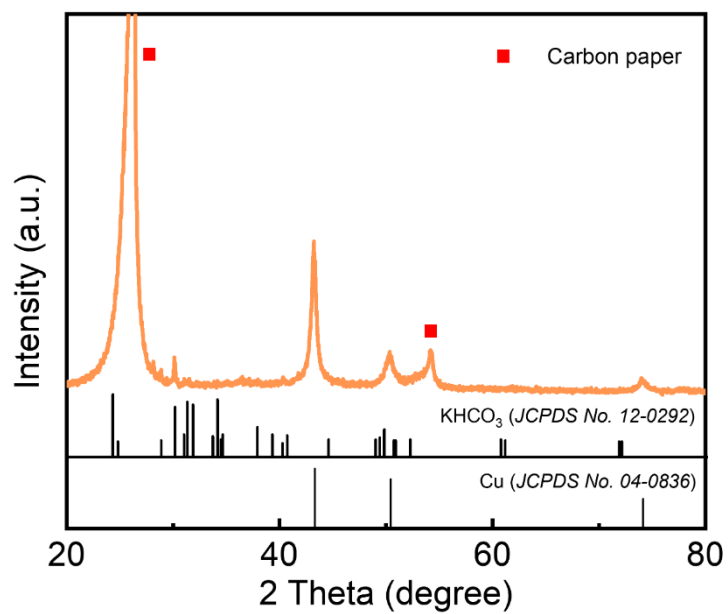

**Supplementary Fig. S16** | The XRD patterns of the electrode loaded with La-Cu HS after  $\text{CO}_2$  reduction.

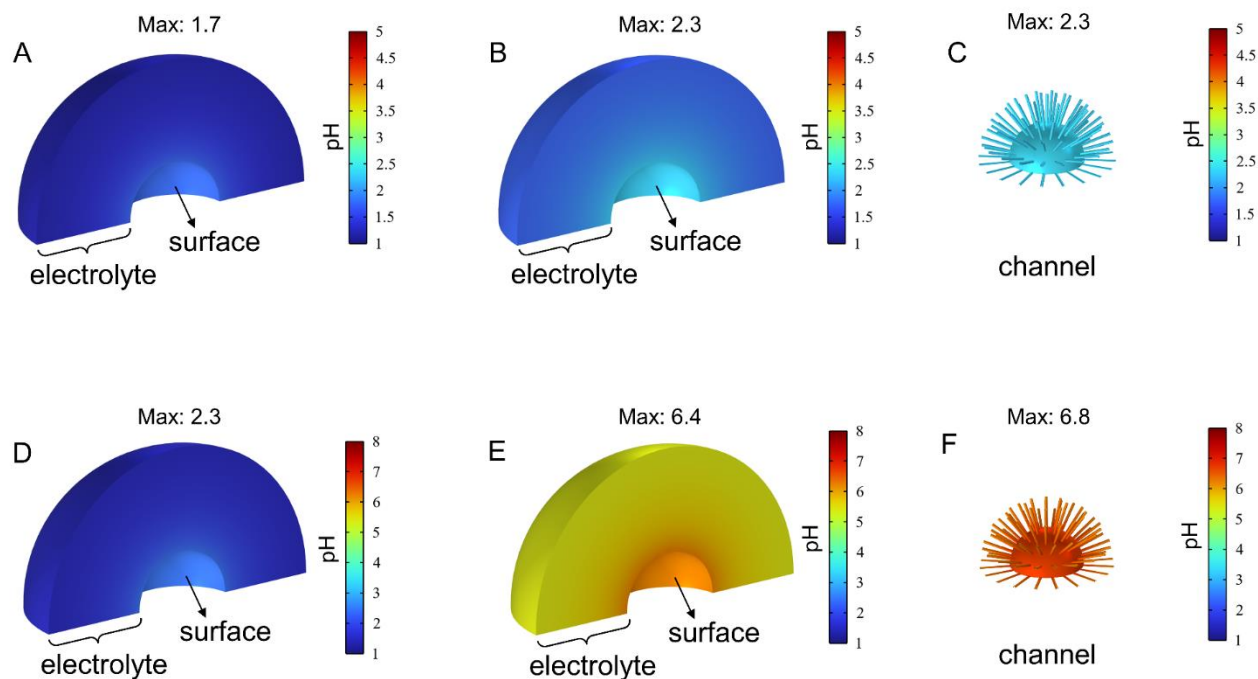

**Supplementary Fig. S17** | The pH distribution in electrolyte near surface of (A) solid sphere, (B) hollow sphere with channels, and within (C) channel of hollow sphere at -300 mA. The pH distribution in electrolyte near surface of (D) solid sphere, (E) hollow sphere with channels, and within (F) channels of hollow sphere at -500 mA.

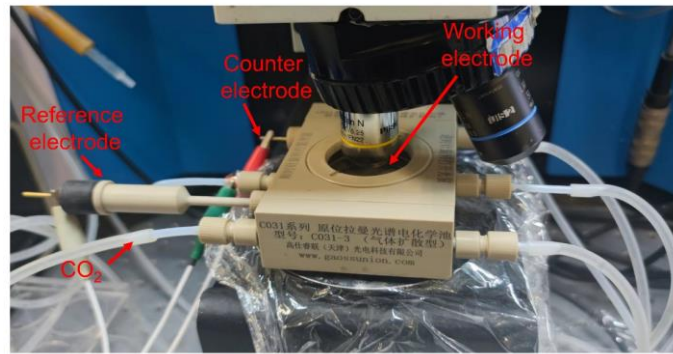

**Supplementary Fig. S18** | The photograph of cell used for *in situ* SERS spectroscopy.

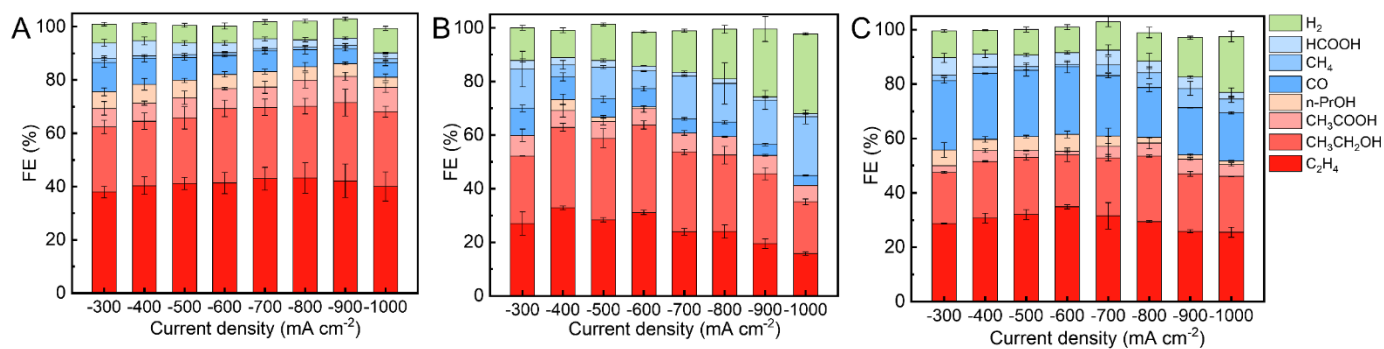

**Supplementary Fig. S19** | The product distribution over (A) La-Cu HS, (B) La-Cu SS, and (C) Cu HS under different current densities. Values are means and error bars indicate s.d. ( $n = 3$  replicates).

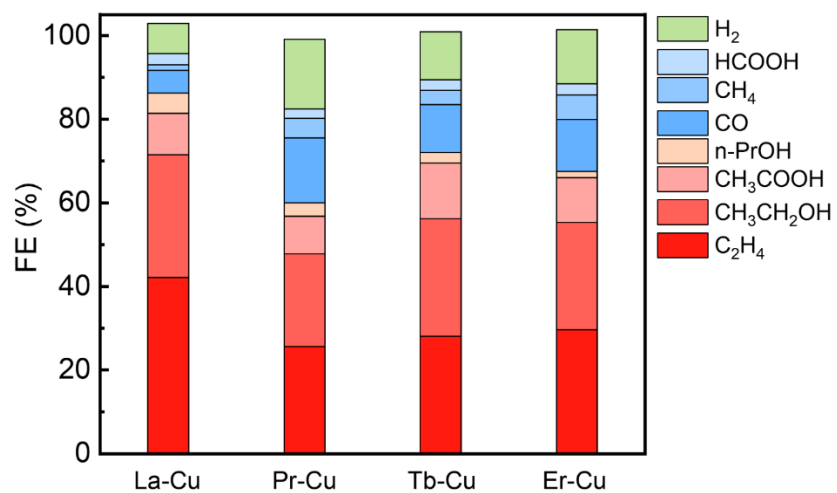

**Supplementary Fig. S20** | The products distribution of La-Cu, Pr-Cu, Tb-Cu and Er-Cu at  $-900 \text{ mA cm}^{-2}$ .

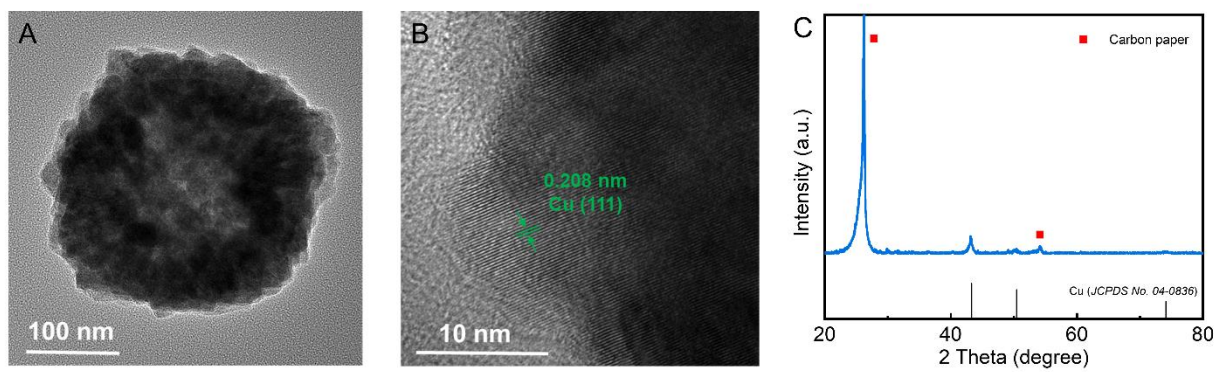

**Supplementary Fig. S21** | (A) TEM image, (B) HRTEM image, and (C) XRD pattern of La-Cu HS with La/Cu ratio of 0.1.

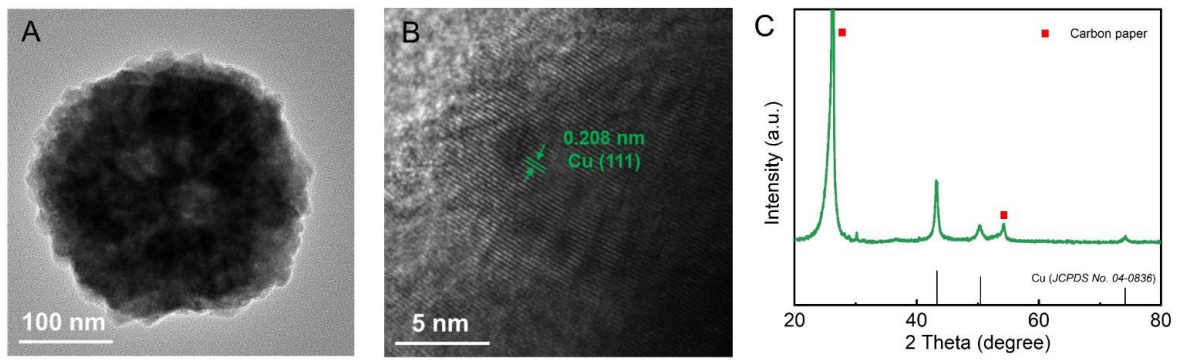

**Supplementary Fig. S22** | (A) TEM image, (B) HRTEM image, and (C) XRD pattern of La-Cu HS with La/Cu ratio of 0.2.

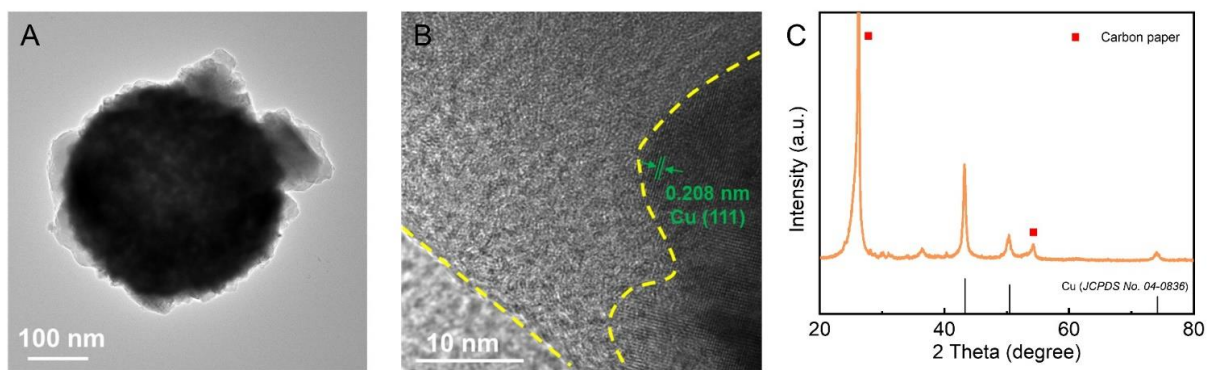

**Supplementary Fig. S23** | (A) TEM image, (B) HRTEM image, and (C) XRD pattern of La-Cu HS with La/Cu ratio of 0.4.



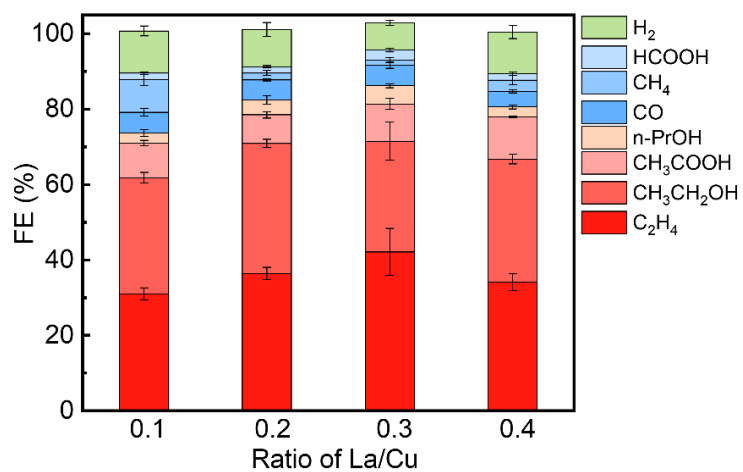

**Supplementary Fig. S24** | Product distribution of La-Cu HS with various La/Cu ratio at  $-900 \text{ mA cm}^{-2}$ . Values are means and error bars indicate s.d. ( $n = 3$  replicates).

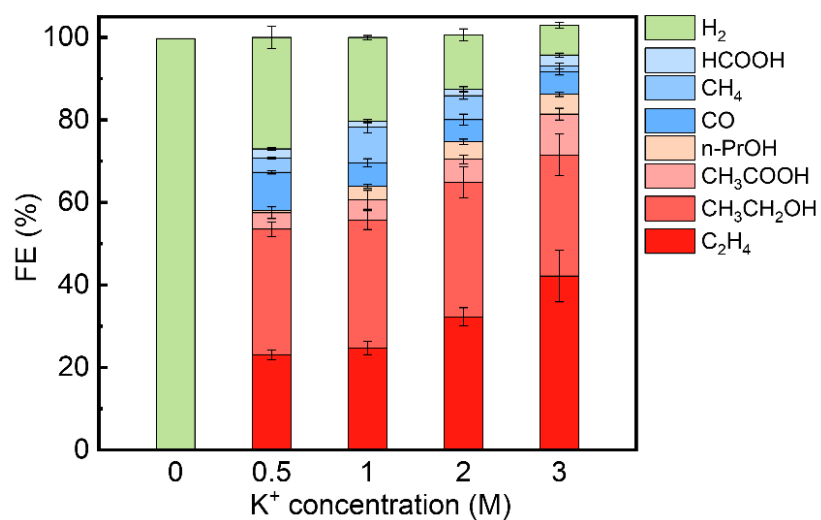

**Supplementary Fig. S25** | The products FE of La-Cu HS in 0.05 M H<sub>2</sub>SO<sub>4</sub> aqueous solution containing different KCl concentrations at -900 mA cm<sup>-2</sup>. Values are means and error bars indicate s.d. (*n* = 3 replicates).

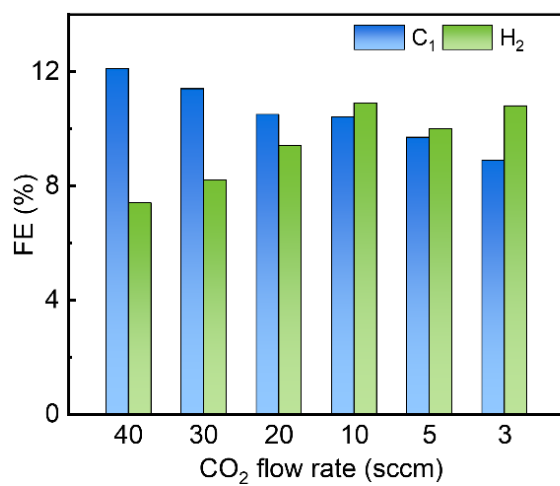

**Supplementary Fig. S26** | C<sub>1</sub> products and H<sub>2</sub> FE of La-Cu HS under different CO<sub>2</sub> gas flow rate at -900 mA cm<sup>-2</sup>

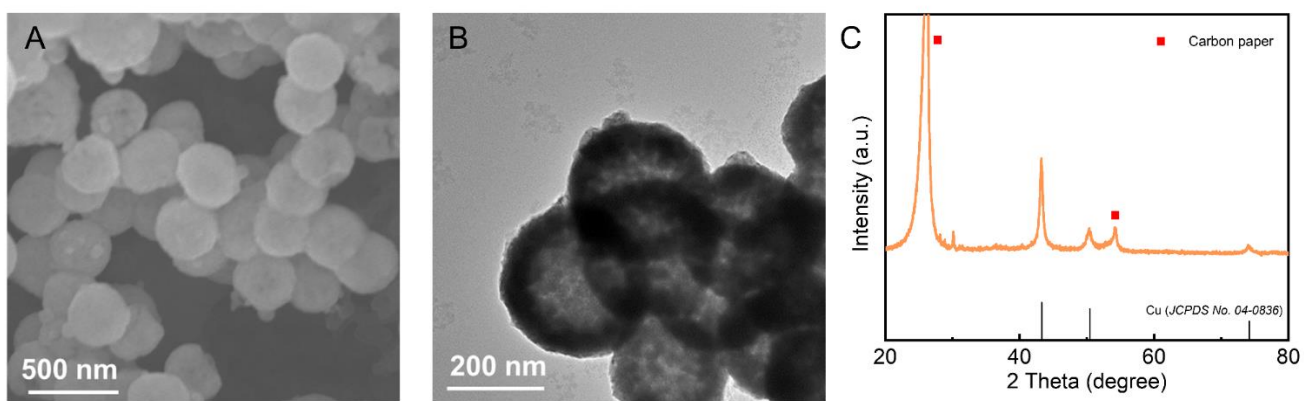

**Supplementary Fig. S27** | (A) SEM image, (B) TEM image, and (C) XRD pattern of La-Cu HS after 40 h CO<sub>2</sub>RR.

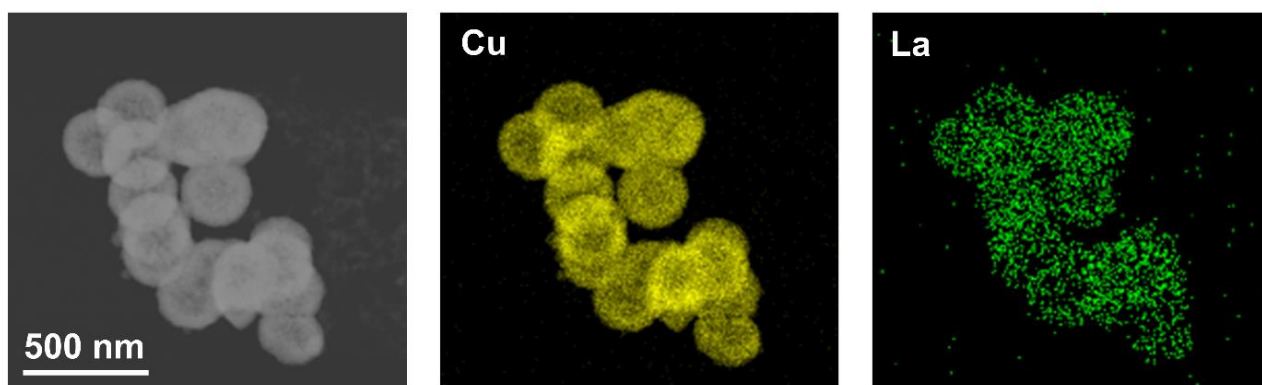

**Supplementary Fig. S28** | EDS mapping of La-Cu HS after 40 h CO<sub>2</sub>RR. Yellow and green represent Cu and La elements, respectively. The results indicate that Cu and La elements are uniformly distributed on La-Cu HS.

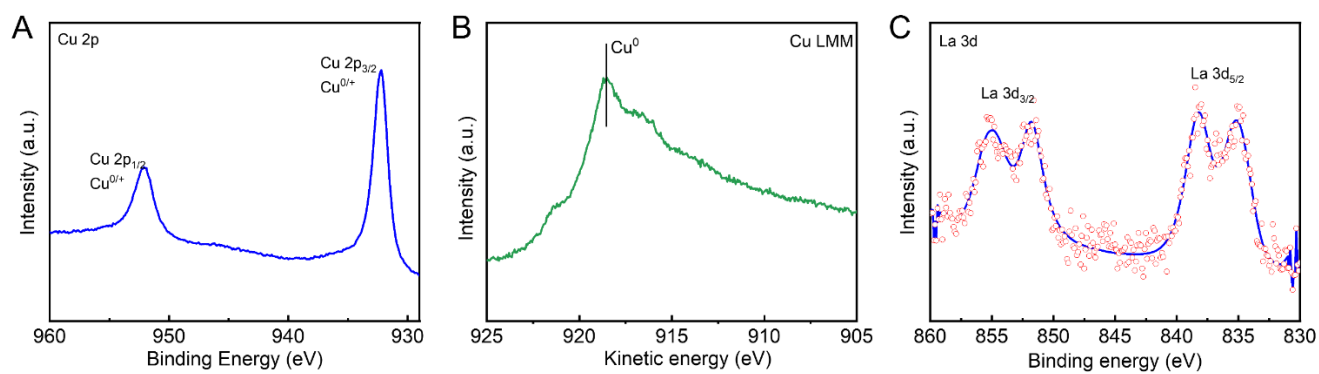

**Supplementary Fig. S29** | (A) Cu 2p<sub>3/2</sub> XPS spectrum, (B) Cu Auger LMM spectrum, and (C) La 3d XPS profile of La-Cu HS after 40 h CO<sub>2</sub>RR.

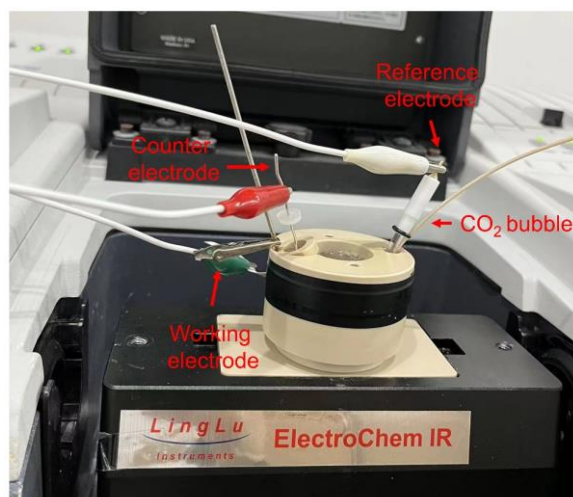

**Supplementary Fig. S30** | The photograph and scheme of cell used for *in situ* ATR-SEIRAS spectroscopy.

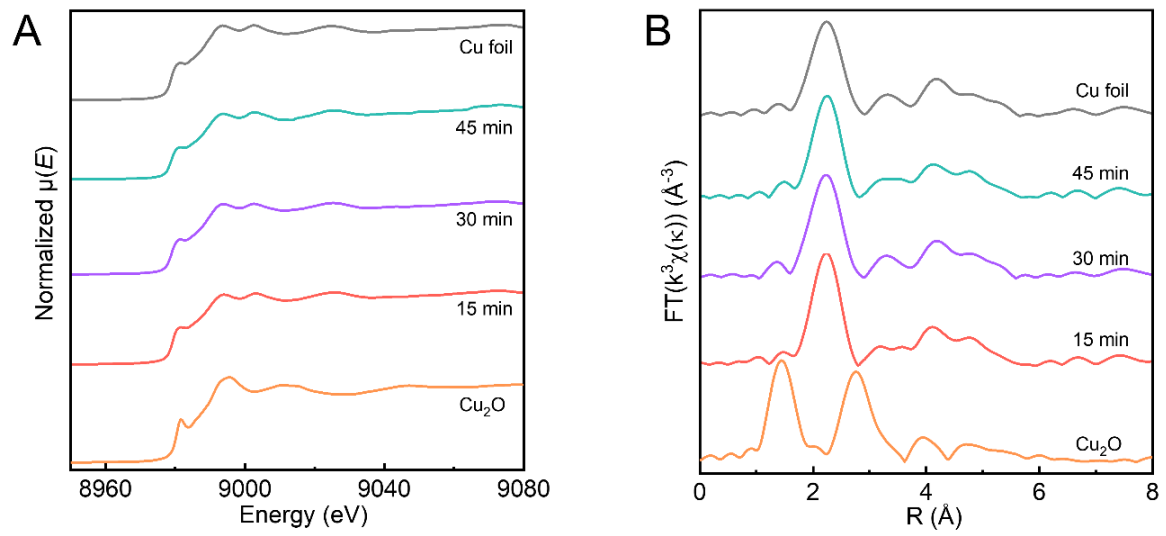

**Supplementary Fig. S31** | (A) *In-situ* Cu K-edge XANES spectra and (B) *in-situ* FT EXAFS spectra of La-Cu HS at different reaction time.



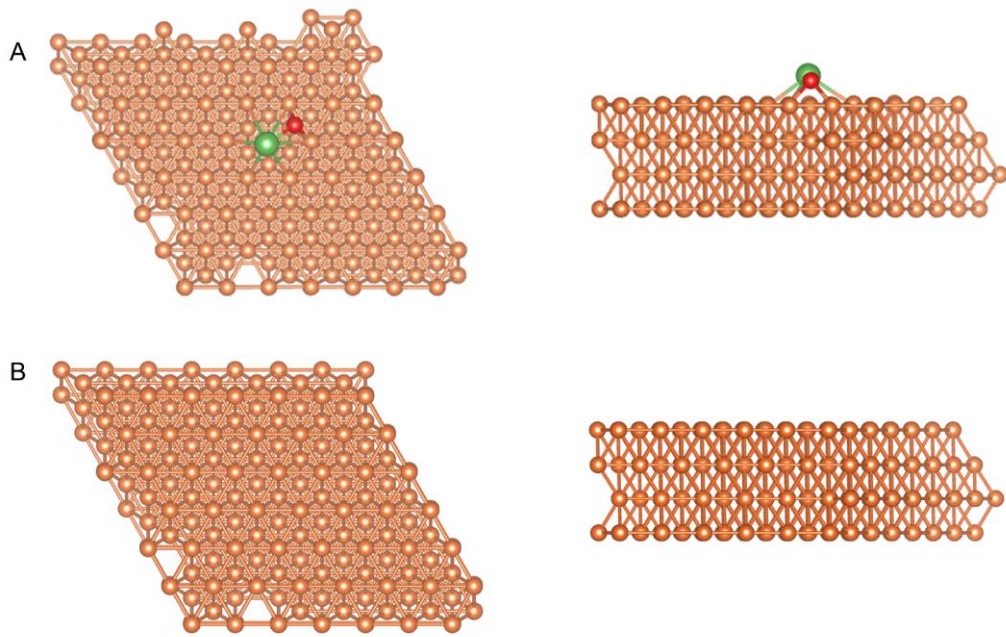

**Supplementary Fig. S32** | Top and side view of (A) La-O-Cu (111) and (B) Cu (111) models.

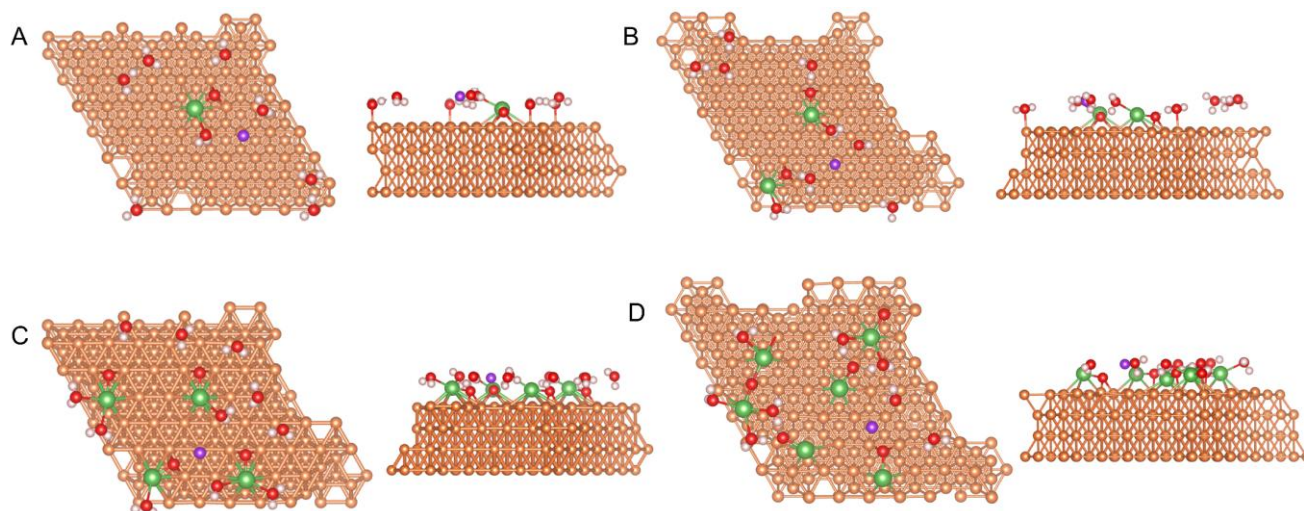

**Supplementary Fig. S33** | Top and side view of (A) 1La-Cu, (B) 2La-Cu, (C) 4La-Cu and (D) 6La-Cu models with H<sub>2</sub>O and K<sup>+</sup> species on surface. The bronze, green, red, white and purple balls represent Cu, La, O, H and K atoms, respectively.

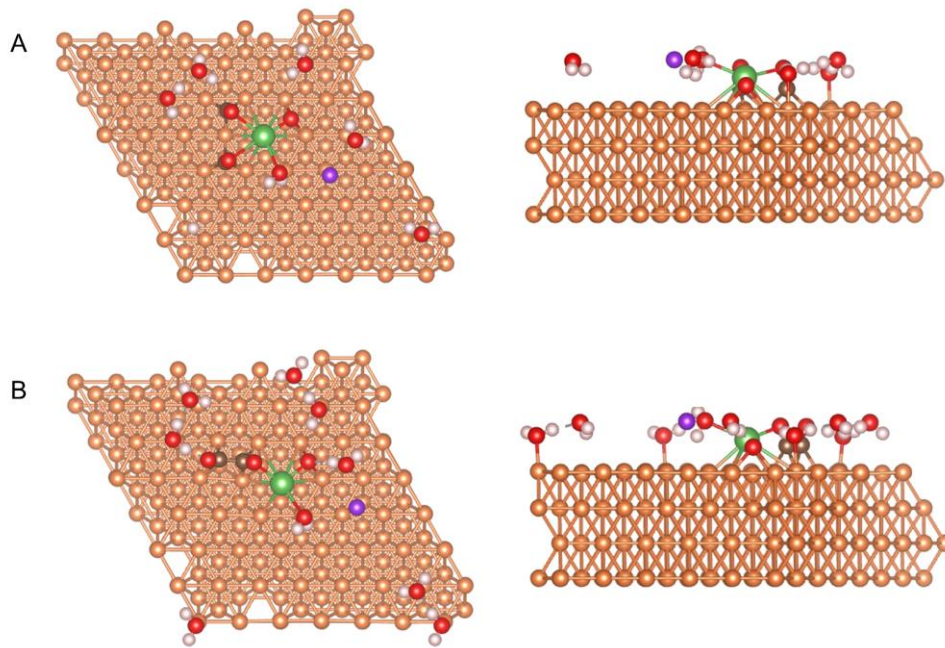

**Supplementary Fig. S34** | Top and side view of (A)  $2^*CO$  and (B)  $O^*CCO$  over 1La-Cu model with  $H_2O$  and  $K^+$  species on surface. The bronze, green, red, black, white and purple balls represent Cu, La, O, C, H and K atoms, respectively.

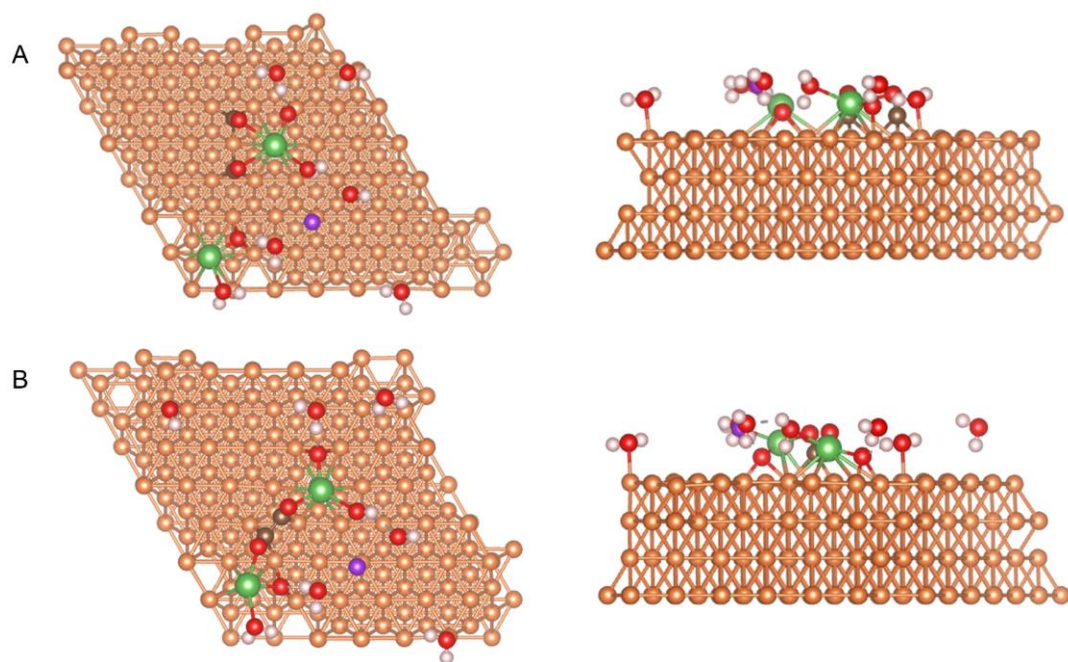

**Supplementary Fig. S35** | Top and side view of (A) 2\*CO and (B) O\*CCO over 2La-Cu model with H<sub>2</sub>O and K<sup>+</sup> species on surface. The bronze, green, red, black, white and purple balls represent Cu, La, O, C, H and K atoms, respectively.

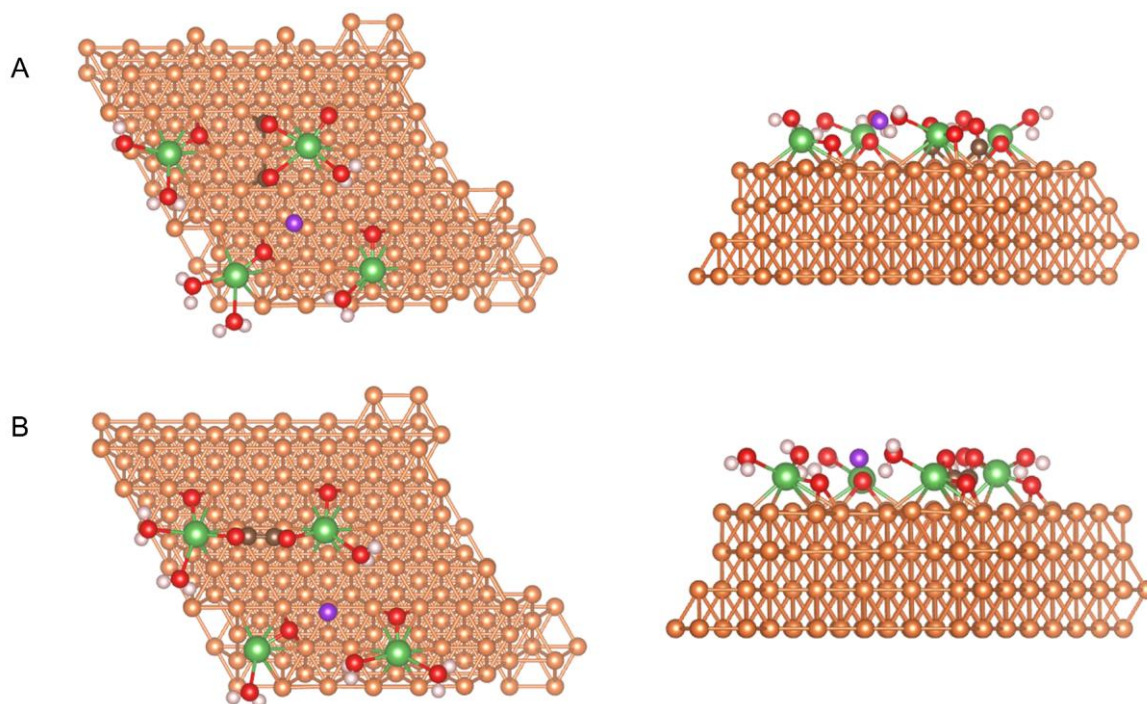

**Supplementary Fig. S36** | Top and side view of (A) 2\*CO and (B) O\*CCO over 4La-Cu model with H<sub>2</sub>O and K<sup>+</sup> species on surface. The bronze, green, red, black, white and purple balls represent Cu, La, O, C, H and K atoms, respectively.

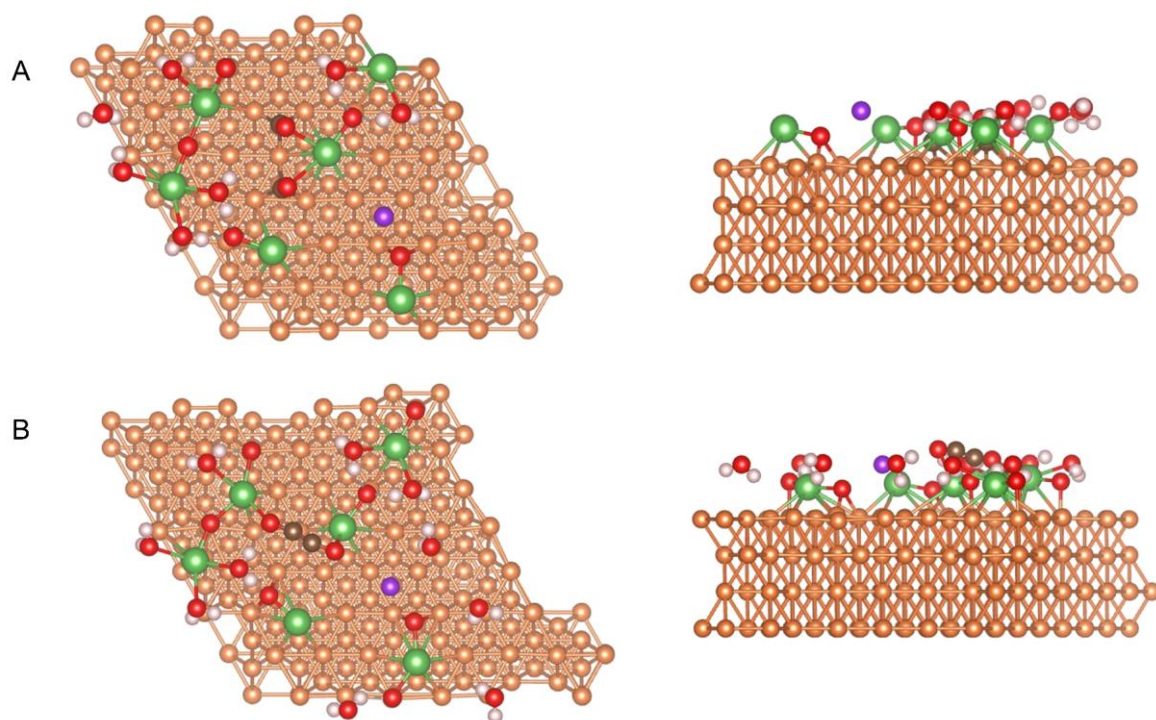

**Supplementary Fig. S37** | Top and side view of (A)  $2^*CO$  and (B)  $O^*CCO$  over 6La-Cu model with  $H_2O$  and  $K^+$  species on surface. The bronze, green, red, black, white and purple balls represent Cu, La, O, C, H and K atoms, respectively.

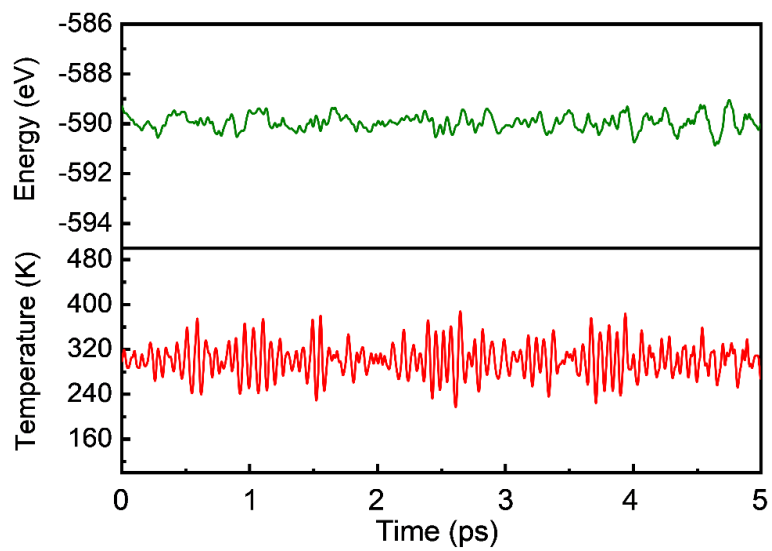

**Supplementary Fig. S38** | Energy and temperature variations during the AIMD simulation for 5 ps.

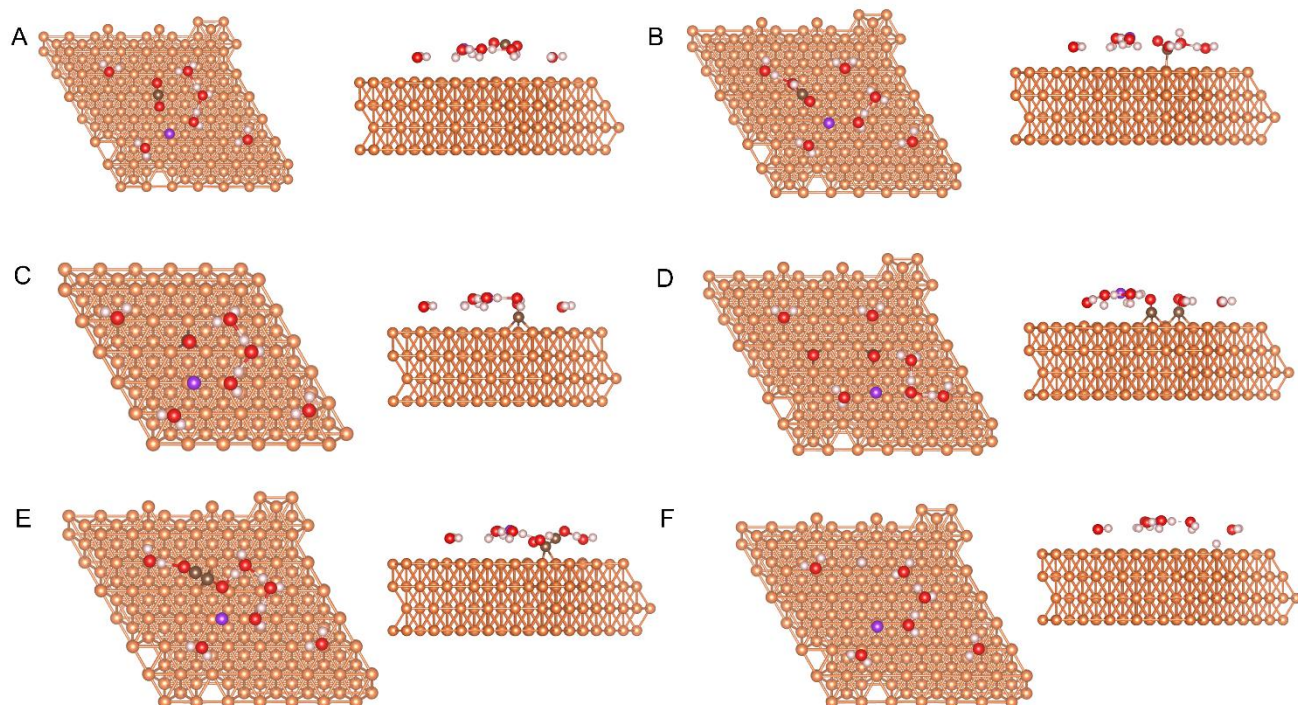

**Supplementary Fig. S39** | Top and side view of (A)  $\text{CO}_2$ , (B)  $\text{*COOH}$ , (C)  $\text{*CO}$ , (D)  $2\text{*CO}$ , (E)  $\text{O*CCO}$  and (F)  $\text{*H}$  over Cu model with  $\text{H}_2\text{O}$  and  $\text{K}^+$  species on surface. The bronze, black, red, white and purple balls represent Cu, C, O, H and K atoms, respectively.



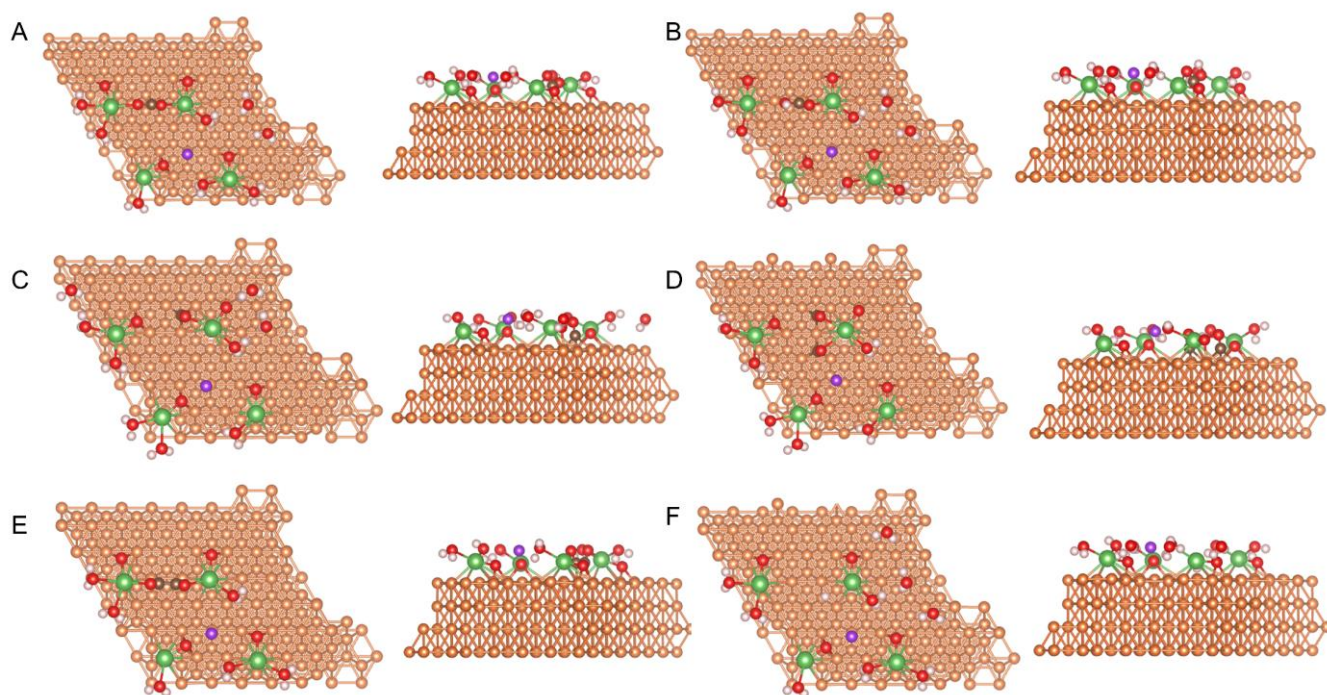

**Supplementary Fig. S40** | Top and side view of (A) CO<sub>2</sub>, (B) \*COOH, (C) \*CO, (D) 2\*CO, (E) O\*CCO and (F) \*H over 4La-Cu model with H<sub>2</sub>O and K<sup>+</sup> species on surface. The bronze, green, black, red, white and purple balls represent Cu, La, C, O, H and K atoms, respectively.

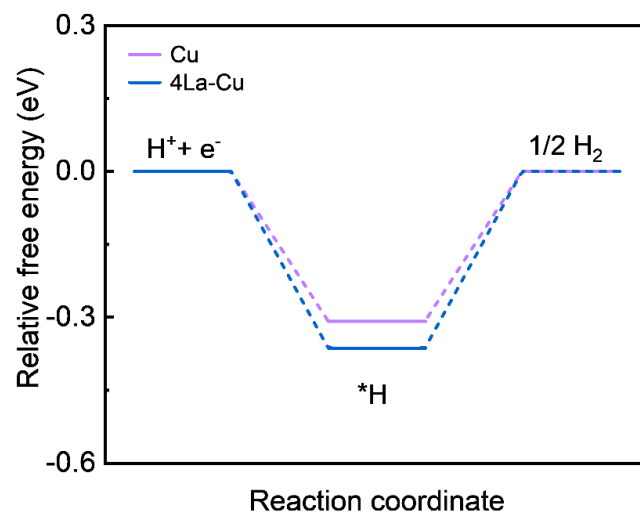

**Supplementary Fig. S41** | Calculated free energy diagram for HER over Cu and 4La-Cu.

**Supplementary Table S1** | Comparison of CO<sub>2</sub>RR-to-C<sub>2+</sub> products over various reported electrocatalysts in acidic electrolyte.

| Catalyst                            | pH | C <sub>2+</sub> FE (%) | <i>j</i> <sub>C<sub>2+</sub></sub> (mA cm <sup>-2</sup> ) | Stability (h) | Ref.      |
|-------------------------------------|----|------------------------|-----------------------------------------------------------|---------------|-----------|
| La-Cu HS                            | <1 | 86.2                   | 775.8                                                     | 40            | This work |
| ER-CuNS                             | <1 | 84                     | 557                                                       | 30            | 1         |
| CAL-modified Cu                     | <1 | 48                     | 576                                                       | 10            | 2         |
| Pd-Cu                               | 2  | 89                     | 500                                                       | 4.5           | 3         |
| Cu/C                                | <1 | ~37                    | ~200                                                      | ~4            | 4         |
| COF:PFSA-modified PTFE-Cu           | <1 | 75                     | 150                                                       | 20            | 5         |
| Cu/PTFE                             | -  | 55                     | ~55                                                       | 9             | 6         |
| EC-Cu                               | <1 | 90                     | ~180                                                      | 10            | 7         |
| Carbon/Cu/PTFE                      | 2  | 64.5*                  | ~200                                                      | -             | 8         |
| Cu <sub>0.9</sub> Zn <sub>0.1</sub> | 4  | 70                     | 210                                                       | ~35           | 9         |
| CG-medium                           | <1 | ~80                    | ~80                                                       | 160           | 10        |
| Cu/15 mM [tolyl-pyr]                | ~1 | 45                     | ~1.1                                                      | 6             | 11        |

\* Represents ethylene Faradaic efficiency

## References

1. Ma, Z. et al. CO<sub>2</sub> electroreduction to multicarbon products in strongly acidic electrolyte via synergistically modulating the local microenvironment. *Nat. Commun.* **13**, 7596 (2022).
2. Huang, J. E. et al. CO<sub>2</sub> electrolysis to multicarbon products in strong acid. *Science* **372**, 1074-1078 (2021).
3. Xie, Y. et al. High carbon utilization in CO<sub>2</sub> reduction to multi-carbon products in acidic media. *Nat. Catal.* **5**, 564-570 (2022).
4. Gu, J. et al. Modulating electric field distribution by alkali cations for CO<sub>2</sub> electroreduction in strongly acidic medium. *Nat. Catal.* **5**, 268-276 (2022).
5. Zhao, Y. et al. Conversion of CO<sub>2</sub> to multicarbon products in strong acid by controlling the catalyst microenvironment. *Nature Synthesis* **2**, 403-412 (2023).
6. O'Brien, C. P. et al. Single pass CO<sub>2</sub> conversion exceeding 85% in the electrosynthesis of multicarbon products via local CO<sub>2</sub> Regeneration. *ACS Energy Lett.* **6**, 2952-2959 (2021).
7. Cao, Y. et al. Surface hydroxide promotes CO<sub>2</sub> electrolysis to ethylene in acidic conditions. *Nat. Commun.* **14**, 2387 (2023).
8. Wang, Z. et al. Localized alkaline environment via in situ electrostatic confinement for enhanced CO<sub>2</sub>-to-ethylene conversion in neutral medium. *J. Am. Chem. Soc.* **145**, 6339-6348 (2023).
9. Zhang, J. et al. Accelerating electrochemical CO<sub>2</sub> reduction to multi-carbon products via asymmetric intermediate binding at confined nanointerfaces. *Nat. Commun.* **14**, 1298 (2023).
10. Fan, M. et al. Cationic-group-functionalized electrocatalysts enable stable acidic CO<sub>2</sub> electrolysis. *Nat. Catal.* **6**, 763-772 (2023).
11. Nie, W., Heim, G. P., Watkins, N. B., Agapie, T. & Peters, J. C. Organic additive-derived films on Cu electrodes promote electrochemical CO<sub>2</sub> reduction to C<sub>2+</sub> products under strongly acidic conditions. *Angew. Chem. Int. Ed.* **62**, e202216102 (2023).
